# Supplementary material for: A complex hepatitis B virus (X/C) recombinant is common in Long An county, Guangxi and may have originated in southern China
Source: PubMed Central journal article supplement (PMC3081081; doi:10.1099/vir.0.026666-0), 2011-02
Supplement: supp_92_2_402__1.pdf [file supp_92_2_402__1.pdf]

**Supplementary Table S1.** Pairwise analysis of genetic distance – full genome (substitution/site)

| Isolate | Genotype |       |       |       |       |       |       |       |       |       |       |       |       |       |       |       |
|---------|----------|-------|-------|-------|-------|-------|-------|-------|-------|-------|-------|-------|-------|-------|-------|-------|
|         | A        |       | B     |       | C     |       | D     |       | E     |       | F     |       | G     |       | H     |       |
|         | Mean     | SD    | Mean  | SD    | Mean  | SD    | Mean  | SD    | Mean  | SD    | Mean  | SD    | Mean  | SD    | Mean  | SDSD  |
| DL706   | 0.086    | 0.006 | 0.095 | 0.005 | 0.079 | 0.004 | 0.110 | 0.003 | 0.107 | 0.001 | 0.150 | 0.003 | 0.117 | 0.001 | 0.152 | 0.004 |
| GM012   | 0.087    | 0.006 | 0.097 | 0.005 | 0.074 | 0.004 | 0.109 | 0.003 | 0.110 | 0.001 | 0.151 | 0.003 | 0.118 | 0.001 | 0.111 | 0.004 |
| GY235   | 0.087    | 0.006 | 0.097 | 0.005 | 0.073 | 0.004 | 0.108 | 0.003 | 0.109 | 0.001 | 0.152 | 0.003 | 0.117 | 0.001 | 0.152 | 0.004 |
| NA167   | 0.086    | 0.005 | 0.096 | 0.005 | 0.079 | 0.004 | 0.105 | 0.003 | 0.105 | 0.001 | 0.150 | 0.003 | 0.116 | 0.001 | 0.150 | 0.004 |
| NS052   | 0.092    | 0.006 | 0.103 | 0.004 | 0.080 | 0.004 | 0.112 | 0.002 | 0.115 | 0.001 | 0.155 | 0.002 | 0.123 | 0.001 | 0.157 | 0.004 |
| QB062   | 0.093    | 0.006 | 0.101 | 0.005 | 0.083 | 0.004 | 0.115 | 0.003 | 0.115 | 0.001 | 0.158 | 0.002 | 0.123 | 0.001 | 0.161 | 0.004 |
| QL523   | 0.094    | 0.004 | 0.099 | 0.005 | 0.066 | 0.006 | 0.111 | 0.003 | 0.110 | 0.001 | 0.154 | 0.002 | 0.125 | 0.001 | 0.154 | 0.004 |
| QP046   | 0.087    | 0.005 | 0.099 | 0.005 | 0.079 | 0.004 | 0.108 | 0.003 | 0.108 | 0.001 | 0.152 | 0.003 | 0.119 | 0.001 | 0.152 | 0.004 |
| QQB36   | 0.089    | 0.006 | 0.098 | 0.005 | 0.078 | 0.004 | 0.109 | 0.003 | 0.111 | 0.001 | 0.153 | 0.003 | 0.117 | 0.001 | 0.152 | 0.004 |
| TF051   | 0.099    | 0.005 | 0.109 | 0.005 | 0.092 | 0.004 | 0.120 | 0.003 | 0.120 | 0.001 | 0.165 | 0.003 | 0.130 | 0.001 | 0.164 | 0.003 |
| TX164   | 0.089    | 0.005 | 0.097 | 0.005 | 0.077 | 0.004 | 0.111 | 0.003 | 0.111 | 0.001 | 0.153 | 0.002 | 0.120 | 0.001 | 0.154 | 0.004 |
| TX327   | 0.089    | 0.005 | 0.098 | 0.005 | 0.075 | 0.004 | 0.110 | 0.003 | 0.110 | 0.001 | 0.153 | 0.003 | 0.119 | 0.001 | 0.152 | 0.004 |
| TZ087   | 0.087    | 0.005 | 0.097 | 0.005 | 0.078 | 0.004 | 0.110 | 0.003 | 0.110 | 0.001 | 0.151 | 0.003 | 0.117 | 0.001 | 0.152 | 0.004 |
| TZ306   | 0.089    | 0.006 | 0.099 | 0.004 | 0.081 | 0.004 | 0.114 | 0.002 | 0.112 | 0.001 | 0.154 | 0.002 | 0.120 | 0.001 | 0.154 | 0.004 |

**Fang, Z.-L., Hué, S., Sabine, C. A., Li, G.-J., Yang, J.-Y., Chen, Q.-Y., Fang, K.-X., Huang, J., Wang, X.-Y. and Harrison, T. J. (2011).** A complex hepatitis B virus (X/C) recombinant is common in Long An county, Guangxi and may have originated in southern China. *J Gen Virol* **92**, 402–411.

|        |       |       |       |       |       |       |       |       |       |       |       |       |       |       |       |       |
|--------|-------|-------|-------|-------|-------|-------|-------|-------|-------|-------|-------|-------|-------|-------|-------|-------|
| WL339  | 0.088 | 0.006 | 0.098 | 0.005 | 0.074 | 0.004 | 0.108 | 0.003 | 0.110 | 0.001 | 0.152 | 0.002 | 0.119 | 0.001 | 0.153 | 0.004 |
| XW233  | 0.102 | 0.006 | 0.111 | 0.005 | 0.093 | 0.004 | 0.123 | 0.003 | 0.126 | 0.001 | 0.170 | 0.004 | 0.129 | 0.001 | 0.169 | 0.004 |
| YL2046 | 0.088 | 0.005 | 0.099 | 0.005 | 0.079 | 0.004 | 0.108 | 0.003 | 0.107 | 0.001 | 0.152 | 0.003 | 0.118 | 0.001 | 0.152 | 0.004 |

**Fang, Z.-L., Hué, S., Sabine, C. A., Li, G.-J., Yang, J.-Y., Chen, Q.-Y., Fang, K.-X., Huang, J., Wang, X.-Y. and Harrison, T. J. (2011).** A complex hepatitis B virus (X/C) recombinant is common in Long An county, Guangxi and may have originated in southern China. *J Gen Virol* **92**, 402–411.

**Supplementary Table S2. Sequencing primers**

| <b>Forward</b> |                                                | <b>Reverse</b> |                                           |
|----------------|------------------------------------------------|----------------|-------------------------------------------|
| LSB1           | nt 2809–2829, 5'-TTGTGGGTCACCATATTCTT-3'       | MDC1           | nt 2304–2324, 5'-TTGATAAGATAGGGGCATTTG-3' |
| ds             | nt 147–166, 5'-TACCGAAAATGGAGAACACA-3'         | POLSEQ<br>5    | nt 2979–2999, 5'-GGGTCCTTGTTGGGGTTGAAG-3' |
| MD14           | nt 418–433, 5'-<br>GCGCTGCAGCTATGCCTCATCTTC-3' | PSISEQ2        | nt 65–84, 5'-GCTGTTCCGGAATTGGAGCC-3'      |
| POLSEQ6        | nt 1089–1109, 5'-TTTCACTTTCTCGCCAACTTA-3'      | ADELN          | nt 432–453, 5'-TAGTCCAGAAGAACCAACAAG-3'   |
| BCPF           | nt 1854–1875, 5'-ATGTCCTACTGTTCAAGCCTCC-3'     | POLSEQ<br>2    | nt 1168–1188, 5'-AGCAAACACTTGGCATAGGC-3'  |
| POLSEQ4        | nt 2305–2323, 5'-AAATGCCCTATCTTATCAA-3'        | MDN5R          | nt 1774–1794, 5'-ATTTATGCCTACAGCCTCCT-3'  |

**Fang, Z.-L., Hué, S., Sabine, C. A., Li, G.-J., Yang, J.-Y., Chen, Q.-Y., Fang, K.-X., Huang, J., Wang, X.-Y. and Harrison, T. J. (2011).** A complex hepatitis B virus (X/C) recombinant is common in Long An county, Guangxi and may have originated in southern China. *J Gen Virol* **92**, 402–411.
